# Supplementary material for: Selecting the Most Relevant Brain Regions to Classify Children with Developmental Dyslexia and Typical Readers by Using Complex Magnocellular Stimuli and Multiple Kernel Learning
Source: MDPI journal article supplement (doi:10.3390/brainsci11060722), 2021-05-28
Supplement: s1 [file s1]

**Table S1a.**  
**Bivariate correlations within reading in the total sample (n=44).**

|                       | <b>TR,<br/>speed</b> | <b>SWR,<br/>accuracy</b> | <b>SWR,<br/>speed</b> | <b>SPWR,<br/>accuracy</b> | <b>SPWR,<br/>speed</b> |
|-----------------------|----------------------|--------------------------|-----------------------|---------------------------|------------------------|
| <b>TR, accuracy</b>   | 0.852**              | 0.731**                  | 0.823**               | 0.853**                   | 0.716**                |
| <b>TR, speed</b>      | 1                    | 0.670**                  | 0.780**               | 0.732**                   | 0.735**                |
| <b>SWR, accuracy</b>  |                      | 1                        | 0.777**               | 0.709**                   | 0.650**                |
| <b>SWR, speed</b>     |                      |                          | 1                     | 0.867**                   | 0.875**                |
| <b>SPWR, accuracy</b> |                      |                          |                       | 1                         | 0.767**                |

TR=Text reading; SWR=single words reading; SPWR=single pseudo-words reading.

\*\*Two-tailed p-value < 0.01

**Table S1b.**  
**Bivariate correlations within VWM**  
**in the total sample (n=44).**

|             | <b>SLBS</b> | <b>SDFS</b> | <b>SDBS</b> |
|-------------|-------------|-------------|-------------|
| <b>SLFS</b> | 0.292       | 0.426**     | 0.462**     |
| <b>SLBS</b> | 1           | 0.358*      | 0.540**     |
| <b>SDFS</b> |             | 1           | 0.268       |

SLFS=single letters forward span; SLBS=single letters backward span; SDFS=single digits forward span; SDBS=single digits backward span; SNWR=single non-word repetition.

\*\*Two-tailed p-value < 0.01; \* two-tailed p-value < 0.05
