# Supplementary material for: Selecting the Most Relevant Brain Regions to Classify Children with Developmental Dyslexia and Typical Readers by Using Complex Magnocellular Stimuli and Multiple Kernel Learning
Source: MDPI journal article supplement (doi:10.3390/brainsci11060722), 2021-05-28
Supplement: s1 [file s1]

**Table S2. Correlations between the mean activation of each contrast map within each significant ROIs and the neuropsychological domains in the total sample (n=44).**

|                            | <b>M-vs-B</b>                            | <b>P-vs-B</b>        | <b>CML6-vs-B</b>          | <b>CML15-vs-B</b>    | <b>CML40-vs-B</b>    |
|----------------------------|------------------------------------------|----------------------|---------------------------|----------------------|----------------------|
|                            | <i>r (p)</i>                             | <i>r (p)</i>         | <i>r (p)</i>              | <i>r (p)</i>         | <i>r (p)</i>         |
|                            | <b>Right Lateral Area 7P</b>             |                      |                           |                      |                      |
| <b>Reading<sup>†</sup></b> | <i>0.312 (0.039)</i>                     | 0.211 (0.168)        | <i>0.552 (&lt;0.001)*</i> | <i>0.409 (0.006)</i> | <i>0.388 (0.009)</i> |
| <b>VWM<sup>‡</sup></b>     | 0.203 (0.191)                            | 0.149 (0.339)        | 0.271 (0.079)             | 0.294 (0.056)        | 0.192 (0.218)        |
| <b>SNWR<sup>§</sup></b>    | <i>0.323 (0.033)</i>                     | <i>0.309 (0.042)</i> | 0.272 (0.074)             | <i>0.324 (0.032)</i> | 0.259 (0.090)        |
|                            | <b>Left Area PGp</b>                     |                      |                           |                      |                      |
| <b>Reading<sup>†</sup></b> | 0.249 (0.102)                            | 0.167 (0.277)        | <i>0.376 (0.012)</i>      | <i>0.348 (0.021)</i> | 0.223 (0.146)        |
| <b>VWM<sup>‡</sup></b>     | -0.013 (0.932)                           | -0.030 (0.851)       | 0.171 (0.273)             | 0.131 (0.402)        | 0.094 (0.548)        |
| <b>SNWR<sup>§</sup></b>    | 0.083 (0.593)                            | 0.091 (0.558)        | 0.183 (0.235)             | 0.212 (0.167)        | 0.066 (0.672)        |
|                            | <b>Left Area V6A</b>                     |                      |                           |                      |                      |
| <b>Reading<sup>†</sup></b> | 0.132 (0.392)                            | -0.076 (0.624)       | <i>0.311 (0.040)</i>      | 0.259 (0.090)        | 0.083 (0.590)        |
| <b>VWM<sup>‡</sup></b>     | 0.040 (0.801)                            | -0.047 (0.765)       | 0.117 (0.453)             | 0.055 (0.728)        | -0.061 (0.699)       |
| <b>SNWR<sup>§</sup></b>    | 0.168 (0.275)                            | 0.081 (0.601)        | 0.205 (0.182)             | <i>0.305 (0.044)</i> | 0.172 (0.263)        |
|                            | <b>Right Medial Area 7A</b>              |                      |                           |                      |                      |
| <b>Reading<sup>†</sup></b> | 0.192 (0.212)                            | 0.170 (0.269)        | <i>0.540 (&lt;0.001)*</i> | 0.256 (0.093)        | 0.297 (0.050)        |
| <b>VWM<sup>‡</sup></b>     | 0.159 (0.308)                            | 0.102 (0.516)        | <i>0.321 (0.036)</i>      | 0.267 (0.084)        | 0.210 (0.176)        |
| <b>SNWR<sup>§</sup></b>    | 0.237 (0.122)                            | 0.188 (0.222)        | <i>0.322 (0.033)</i>      | <i>0.350 (0.020)</i> | <i>0.322 (0.033)</i> |
|                            | <b>Left Ventro-Medial Visual Area 1</b>  |                      |                           |                      |                      |
| <b>Reading<sup>†</sup></b> | -0.032 (0.837)                           | -0.236 (0.122)       | 0.263 (0.085)             | 0.280 (0.065)        | 0.210 (0.170)        |
| <b>VWM<sup>‡</sup></b>     | 0.111 (0.477)                            | 0.045 (0.773)        | <i>0.302 (0.049)</i>      | 0.262 (0.089)        | 0.285 (0.064)        |
| <b>SNWR<sup>§</sup></b>    | -0.080 (0.605)                           | 0.083 (0.593)        | <i>0.419 (0.005)</i>      | <i>0.477 (0.001)</i> | <i>0.360 (0.016)</i> |
|                            | <b>Left Area Lateral Occipital 2</b>     |                      |                           |                      |                      |
| <b>Reading<sup>†</sup></b> | 0.252 (0.099)                            | -0.121 (0.433)       | 0.286 (0.059)             | 0.260 (0.088)        | <i>0.319 (0.035)</i> |
| <b>VWM<sup>‡</sup></b>     | <i>0.419 (0.005)</i>                     | 0.251 (0.104)        | <i>0.442 (0.003)</i>      | <i>0.315 (0.039)</i> | <i>0.410 (0.006)</i> |
| <b>SNWR<sup>§</sup></b>    | <i>0.307 (0.043)</i>                     | 0.115 (0.458)        | 0.231 (0.132)             | <i>0.473 (0.001)</i> | <i>0.329 (0.029)</i> |
|                            | <b>Right Area IFJ posterior</b>          |                      |                           |                      |                      |
| <b>Reading<sup>†</sup></b> | <i>0.461 (0.002)</i>                     | 0.208 (0.175)        | <i>0.306 (0.043)</i>      | 0.123 (0.428)        | 0.167 (0.279)        |
| <b>VWM<sup>‡</sup></b>     | 0.227 (0.144)                            | 0.083 (0.598)        | 0.083 (0.595)             | 0.050 (0.749)        | 0.076 (0.626)        |
| <b>SNWR<sup>§</sup></b>    | 0.180 (0.242)                            | 0.178 (0.247)        | 0.220 (0.151)             | 0.023 (0.880)        | -0.034 (0.827)       |
|                            | <b>Right Ventro-Medial Visual Area 1</b> |                      |                           |                      |                      |
| <b>Reading<sup>†</sup></b> | <i>0.331 (0.028)</i>                     | 0.143 (0.354)        | 0.198 (0.197)             | 0.206 (0.179)        | 0.177 (0.251)        |
| <b>VWM<sup>‡</sup></b>     | 0.215 (0.166)                            | 0.212 (0.173)        | 0.127 (0.417)             | -0.005 (0.976)       | 0.044 (0.777)        |
| <b>SNWR<sup>§</sup></b>    | 0.170 (0.270)                            | 0.158 (0.305)        | <i>0.370 (0.014)</i>      | <i>0.393 (0.008)</i> | <i>0.303 (0.046)</i> |
|                            | <b>Right Area 5-L</b>                    |                      |                           |                      |                      |

|                                          |                      |                      |                      |                      |                      |
|------------------------------------------|----------------------|----------------------|----------------------|----------------------|----------------------|
| <b>Reading<sup>†</sup></b>               | 0.004 (0.978)        | 0.000 (0.999)        | <i>0.492 (0.001)</i> | 0.257 (0.092)        | 0.191 (0.214)        |
| <b>VWM<sup>‡</sup></b>                   | -0.059 (0.708)       | -0.066 (0.675)       | 0.279 (0.071)        | 0.300 (0.050)        | 0.201 (0.197)        |
| <b>SNWR<sup>§</sup></b>                  | -0.118 (0.446)       | -0.118 (0.447)       | <i>0.322 (0.033)</i> | <i>0.414 (0.005)</i> | <i>0.321 (0.034)</i> |
| <b>Right Area PH</b>                     |                      |                      |                      |                      |                      |
| <b>Reading<sup>†</sup></b>               | <i>0.428 (0.004)</i> | <i>0.314 (0.038)</i> | 0.215 (0.162)        | 0.221 (0.150)        | 0.176 (0.254)        |
| <b>VWM<sup>‡</sup></b>                   | 0.273 (0.077)        | 0.161 (0.304)        | -0.031 (0.843)       | 0.035 (0.823)        | -0.022 (0.891)       |
| <b>SNWR<sup>§</sup></b>                  | <i>0.383 (0.010)</i> | <i>0.337 (0.025)</i> | <i>0.391 (0.009)</i> | <i>0.420 (0.005)</i> | <i>0.324 (0.032)</i> |
| <b>Right Ventro-Medial Visual Area 2</b> |                      |                      |                      |                      |                      |
| <b>Reading<sup>†</sup></b>               | 0.289 (0.057)        | 0.070 (0.652)        | 0.173 (0.263)        | 0.179 (0.246)        | 0.121 (0.434)        |
| <b>VWM<sup>‡</sup></b>                   | 0.268 (0.083)        | 0.116 (0.459)        | 0.136 (0.385)        | 0.011 (0.945)        | 0.058 (0.713)        |
| <b>SNWR<sup>§</sup></b>                  | 0.123 (0.428)        | 0.161 (0.297)        | <i>0.332 (0.028)</i> | 0.273 (0.073)        | 0.194 (0.206)        |

Uncorrected significant correlations are reported in italics.

\* Significant after Bonferroni correction for multiple comparisons.

M-vs-B=M stimulus *versus* Baseline; P-vs-B=M stimulus *versus* Baseline; CML6-vs-B=Coherent Motion Level 6% *versus* Baseline; CML15-vs-B=Coherent Motion Level 15% *versus* Baseline; CML40-vs-B=Coherent Motion Level 40% *versus* Baseline; SNWR=single non-words repetition.

<sup>†</sup> Mean score of text [109-110], single unrelated words and pronounceable pseudo-words [111-112] reading tests.

<sup>‡</sup> Mean score of the Single Digit Forward Span, Single Digit Backward Span, Single Letter Forward Span, Single Letter Backward Span tasks [113].

<sup>§</sup> As assessed by the non-word repetition test [114].
